# Supplementary material for: Investigation of the effect of pore size on gas uptake in two fsc metal–organic frameworks
Source: Royal Society of Chemistry journal article supplement (doi:10.1039/c4cc00477a), 2014-01-01

## Supporting Information

### Investigation of the Effect of Pore Size on Gas Uptake in Two *fsc* Metal-Organic Frameworks

Rongming Wang,<sup>a</sup> Qingguo Meng,<sup>b</sup> Liangliang Zhang,<sup>a</sup> Haifeng Wang,<sup>a</sup> Fangna Dai,<sup>a</sup>  
Wenyue Guo,<sup>a\*</sup> Lianming Zhao,<sup>a</sup> Daofeng Sun<sup>a\*</sup>

<sup>a</sup>State Key Laboratory of Heavy Oil Processing, China University of Petroleum (East China), College of Science, China University of Petroleum (East China), Qingdao Shandong 266580, People's Republic of China.

E-mail: [dfsun@upc.edu.cn](mailto:dfsun@upc.edu.cn), [wgyuo@upc.edu.cn](mailto:wgyuo@upc.edu.cn)

<sup>b</sup>Chemistry & Chemical and Environmental Engineering College, Weifang University, Weifang 261061, China)

|                                                          |   |
|----------------------------------------------------------|---|
| <b>Materials and Methods</b> .....                       | 2 |
| <b>Preparation of 1</b> .....                            | 3 |
| <b>Preparation of 2</b> .....                            | 3 |
| <b>X-ray Crystallography</b> .....                       | 4 |
| <b>Table S1. Crystallographic Data for 1 and 2</b> ..... | 5 |
| <b>Fig. S1: TGA of 1</b> .....                           | 6 |
| <b>Fig. S2: TGA of 2</b> .....                           | 6 |
| <b>Fig. S3: XRD of 1</b> .....                           | 7 |
| <b>Fig. S4: XRD of 2</b> .....                           | 7 |

## Materials and Methods

All of the reagents and solvents employed were commercially available and used as received without further purification. Elemental analysis was carried out on a CE instruments EA 1110 elemental analyzer. X-ray powder diffractions were measured on a Bruker AXS D8 Advance with Cu  $K_{\alpha}$  ( $\lambda = 1.5418 \text{ \AA}$ , 40.0 kV, 30.0 mA) radiation. Gas sorption experiments were carried out on the surface area analyzer ASAP-2020. The intensity data of **1** and **2** were collected at 150 K on an Agilent Xcalibur Eos Gemini diffractometer with Enhance (Cu) X-ray Source (Cu- $K_{\alpha}$ ,  $\lambda = 1.54178 \text{ \AA}$ ). Thermogravimetric analysis (TGA) was carried out in a static  $N_2$  with a heating rate of 10 °C/min.

### Preparation of **1**

H<sub>4</sub>BPTC (8 mg, 0.025 mmol), Co(NO<sub>3</sub>)<sub>2</sub>•6H<sub>2</sub>O (58.2 mg, 0.2 mmol), pyrazine (16 mg, 0.2 mmol), KOH (1.5 ml, 0.1 M) and DMF-C<sub>2</sub>H<sub>5</sub>OH-H<sub>2</sub>O (15 ml, 1:1:1) were added to a small vial, which was sealed and put into a programmed oven, slowly heated to 80°C from room temperature in 300 minutes, kept at 80°C for 4320 min. After slowly cooled to 30°C in 500 minutes, light red block crystals of **1** were separated in 81% yield based on ligand H<sub>4</sub>BPTC. Elemental analysis: Anal. Calc.: C 44.26, H 6.12, N 9.11 %. Found: C 43.41, H 5.88, N 9.12 %.

### Preparation of **2**

A mixture of Co(NO<sub>3</sub>)<sub>2</sub>•6H<sub>2</sub>O (2.9 mg, 0.01 mmol), H<sub>4</sub>BPTC (1 mg, 0.003 mmol), 4,4'-bipy (1.6 mg, 0.01 mmol), HCl (0.2 ml, 0.5 M) in DMF-C<sub>2</sub>H<sub>5</sub>OH-H<sub>2</sub>O (1 ml, 4:1:1) were sealed in a pressure-resistant glass tube and put into a programmed oven, slowly heated to 120°C from room temperature in 500 minutes, kept at 120°C for 4320 min, After slowly cooled to 30°C in 800 minutes, light red block crystals of **2** were separated in 73% yield based on ligand H<sub>4</sub>BPTC. Elemental analysis: Anal. Calc.: C 47.82, H 5.73, N 9.11 %. Found: C 47.37, H 4.88, N 8.99 %.

## X-ray Crystallography

The intensity data of **1** and **2** were collected at 150 K on an Agilent Xcalibur Eos Gemini diffractometer with Enhance (Cu) X-ray Source (Cu-K $\alpha$ ,  $\lambda = 1.54178$  Å). Absorption corrections were applied by using the multi-scan method. Data were integrated and corrected for Lorentz, polarization, and absorption effects. Space group determinations were made based on systematic absences, E statistics, and successful refinement of the structure. Structures were solved by direct method and refined by full-matrix least-squares on  $F^2$  using *SHELXTL* [S1-3]. Non-hydrogen atoms were refined with anisotropic displacement parameters during the final cycles. Organic hydrogen atoms were placed in calculated positions with isotropic displacement parameters set to  $1.2$  or  $1.5 \times U_{\text{eq}}$  of the attached atom. For **1**, the solvent accessible void volumes in the crystals are occupied by disordered DMF, EtOH and water molecules. No satisfactory disorder model could be achieved, and therefore *PLATON/SQUEEZE* routine [S4] was used to remove these electron densities. Crystal and refinement parameters are listed in Table S1. CCDC No. 981845, 981846 for **1** and **2**.

## References

- [S1] R.H. Blessing, *Acta. Crystallogr.* 1995, A51, 33.
- [S2] G.M. Sheldrick, *SHELXS 97: Program for Crystal Structure Solution*, University of Göttingen: Göttingen, Germany, 1997.
- [S3] G.M. Sheldrick, *SHELXL 97: Program for Crystal Structure refinement*, University of Göttingen: Göttingen, Germany, 1997.
- [S4] Spek, A. *J. Appl. Crystallogr.* 2003, 36, 7-13.

**Table S1. Crystallographic Data for 1 and 2**

| Complexes                                             | 1                                                              | 2                                                               |
|-------------------------------------------------------|----------------------------------------------------------------|-----------------------------------------------------------------|
| Formula                                               | C <sub>12</sub> H <sub>7</sub> CoN <sub>2</sub> O <sub>4</sub> | C <sub>18</sub> H <sub>11</sub> CoN <sub>2</sub> O <sub>4</sub> |
| $M_r$                                                 | 302.13                                                         | 378.22                                                          |
| Crystal system                                        | orthorhombic                                                   | monoclinic                                                      |
| Space group                                           | Pbam                                                           | P2 <sub>1</sub> /c                                              |
| $a$ (Å)                                               | 13.2606(15)                                                    | 11.3988(2)                                                      |
| $b$ (Å)                                               | 17.5002(17)                                                    | 17.3695(2)                                                      |
| $c$ (Å)                                               | 7.1051(11)                                                     | 13.24337(19)                                                    |
| $\alpha$ (deg)                                        | 90                                                             | 90                                                              |
| $\beta$ (deg)                                         | 90                                                             | 92.4376(15)                                                     |
| $\gamma$ (deg)                                        | 90                                                             | 90                                                              |
| $Z$                                                   | 4                                                              | 4                                                               |
| $V$ (Å <sup>3</sup> )                                 | 1648.8(4)                                                      | 2619.71(7)                                                      |
| $D_c$ (g cm <sup>-3</sup> )                           | 1.217                                                          | 0.959                                                           |
| $\mu$ (mm <sup>-1</sup> )                             | 8.259                                                          | 5.281                                                           |
| F(000)                                                | 608                                                            | 768                                                             |
| no. of unique reflns                                  | 1601                                                           | 4680                                                            |
| no. of obsd reflns [ $I > 2\sigma(I)$ ]               | 4871                                                           | 18500                                                           |
| Parameters                                            | 106                                                            | 226                                                             |
| GOF                                                   | 1.078                                                          | 1.085                                                           |
| Final $R$ indices [ $I > 2\sigma(I)$ ] <sup>a,b</sup> | $R_1 = 0.0768,$<br>$wR_2 = 0.2564$                             | $R_1 = 0.0725,$<br>$wR_2 = 0.2031$                              |
| $R$ indices (all data)                                | $R_1 = 0.0885,$<br>$wR_2 = 0.2708$                             | $R_1 = 0.0786,$<br>$wR_2 = 0.2087$                              |
| $\Delta\rho$ (e Å <sup>-3</sup> )                     | 0.558 and -0.852                                               | 1.659 and -1.202                                                |

Fig. S1: TGA curve of 1

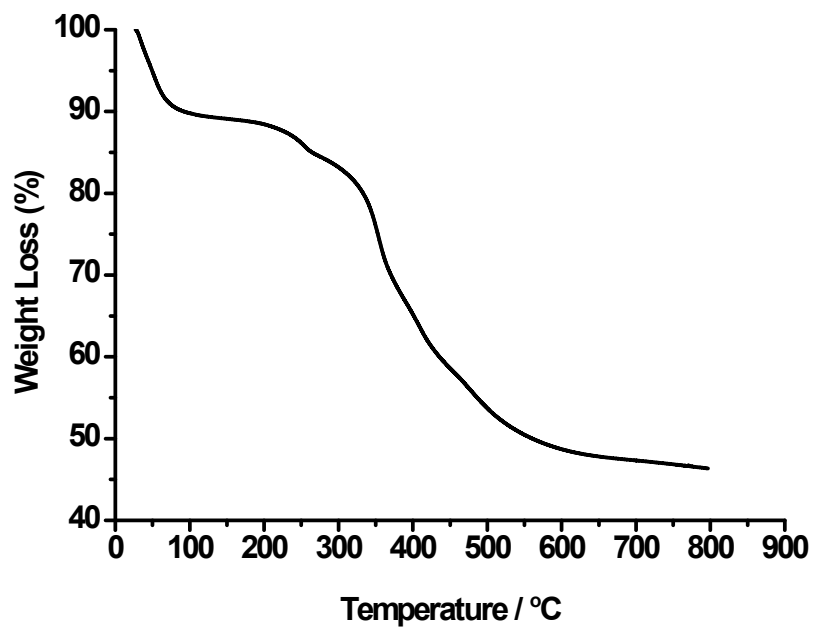

Fig. S2: TGA curve of 2

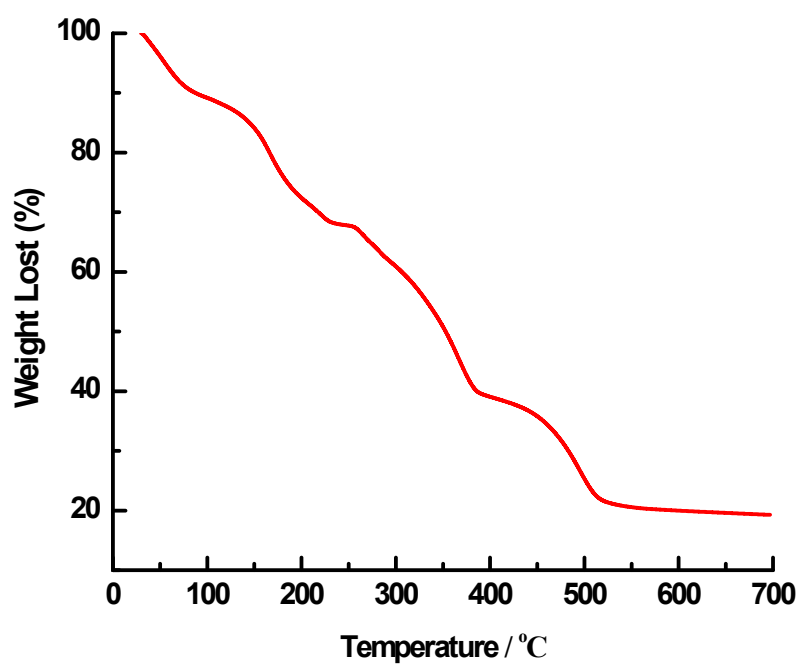

Fig. S3: XRD of 1

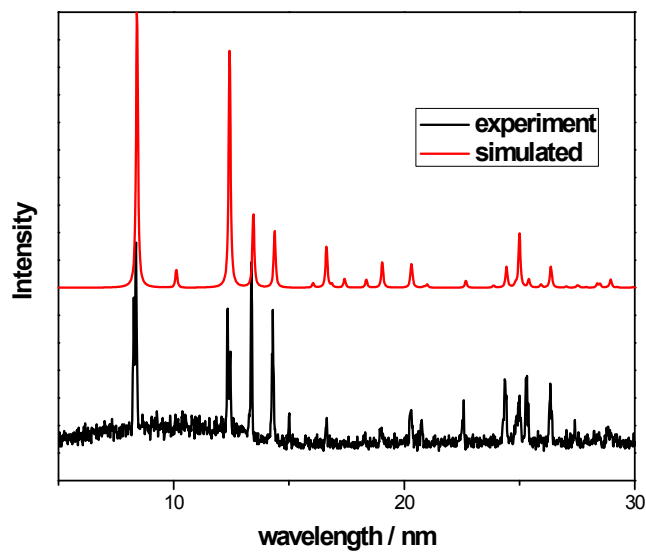

Fig. S4: XRD of 2

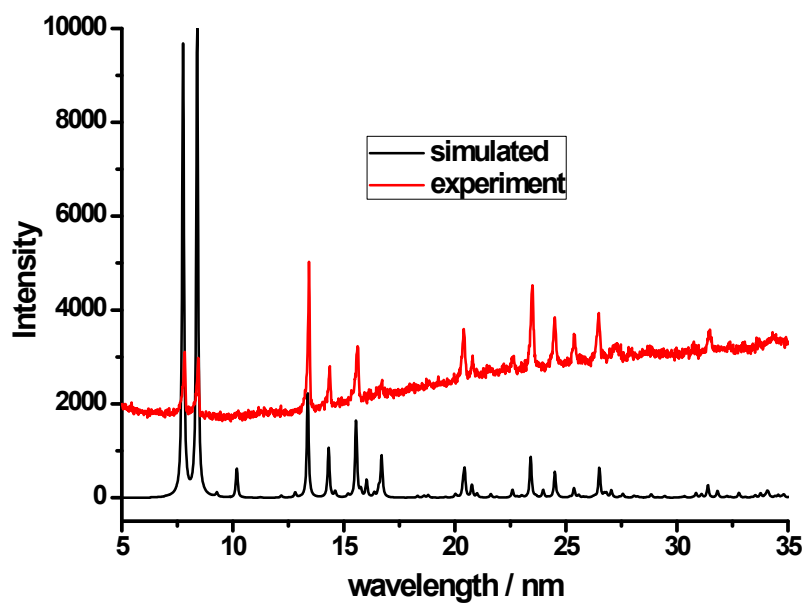

Supplement: c4cc00477a1.pdf [file c4cc00477a1.pdf]
